# Supplementary material for: Performance and mechanisms for removal of perfluorooctanoate (PFOA) from aqueous solution by activated carbon fiber
Source: Royal Society of Chemistry journal article supplement (doi:10.1039/c5ra15853b), 2015-01-01
Supplement: c5ra15853b1.pdf [file c5ra15853b1.pdf]

1 **Supplementary Material for “Performance and mechanisms**  
2 **for removal of perfluorooctanoate (PFOA) from aqueous**  
3 **solution by activated carbon fiber”**

4 Yujuan Wang, Junfeng Niu\*, Yang Li, Taojie Zheng, Yi Xu, Ye Liu

5 State Key Laboratory of Water Environment Simulation, School of Environment, Beijing Normal  
6 University, Beijing 100875, PR China.

7

8

9

10

11

12

13

14

15

16

17

18

19

---

\* Corresponding author: School of Environment, Beijing Normal University, Beijing 100875, P.R. China  
Tel./fax: +86-10-5880 7612

*E-mail address:* junfengn@bnu.edu.cn (J.F. Niu)

20 **This supporting information contains the following sections:**

21 S1. PFOA concentrations in the bank experiments without ACF (Table S1)

22 S2. Quantitative standard curve of PFOA (Fig. S1)

23 S3. Sorption kinetics of PFOA on ACF and the fitting parameters using the pseudo-first-order  
24 and the pseudo-second-order models (Table S2)

25 S4. Kinetic parameters of intraparticle diffusion model for PFOA sorption on ACF (Table S3)

26 S5. Sorption equilibrium constants of Freundlich model and Langmuir model for PFOA sorption  
27 on ACF (Table S4)

28 S6. Fourier transform infrared spectroscopy (FT-IR) spectrum of ACF (Fig. S2)

29 S7. Sorption capacities of PFCAs solution containing PFHxA, PFHpA, PFOA, PFNA and PFDA  
30 on ACF in the mixed PFCA systems (PFCAs at each concentration of 1 mg L<sup>-1</sup> and ACF of 5  
31 mg) (Fig. S3)

32

33

34

35

36

37

38

39

40

41 **Table S1** PFOA concentrations in the bank experiments without ACF

42

---

| Time (h) | Number of the replicates | Initial concentration (mg L <sup>-1</sup> ) | Final concentration (mg L <sup>-1</sup> ) |
|----------|--------------------------|---------------------------------------------|-------------------------------------------|
| 0        | 3                        | 100                                         | 100.58 ± 0.49                             |
| 0.08     | 3                        | 100                                         | 99.71 ± 0.52                              |
| 0.25     | 3                        | 100                                         | 99.65 ± 0.71                              |
| 0.5      | 3                        | 100                                         | 100.78 ± 0.41                             |
| 1        | 3                        | 100                                         | 101.51 ± 0.12                             |
| 1.5      | 3                        | 100                                         | 99.11 ± 1.32                              |
| 2        | 3                        | 100                                         | 100.13 ± 0.58                             |
| 4        | 3                        | 100                                         | 100.02 ± 0.50                             |
| 6        | 3                        | 100                                         | 100.80 ± 0.77                             |
| 8        | 3                        | 100                                         | 99.65 ± 0.82                              |
| 10       | 3                        | 100                                         | 101.38 ± 0.21                             |
| 12       | 3                        | 100                                         | 100.67 ± 0.12                             |
| 24       | 3                        | 100                                         | 100.67 ± 0.34                             |

---

43

44

45

46

47

48

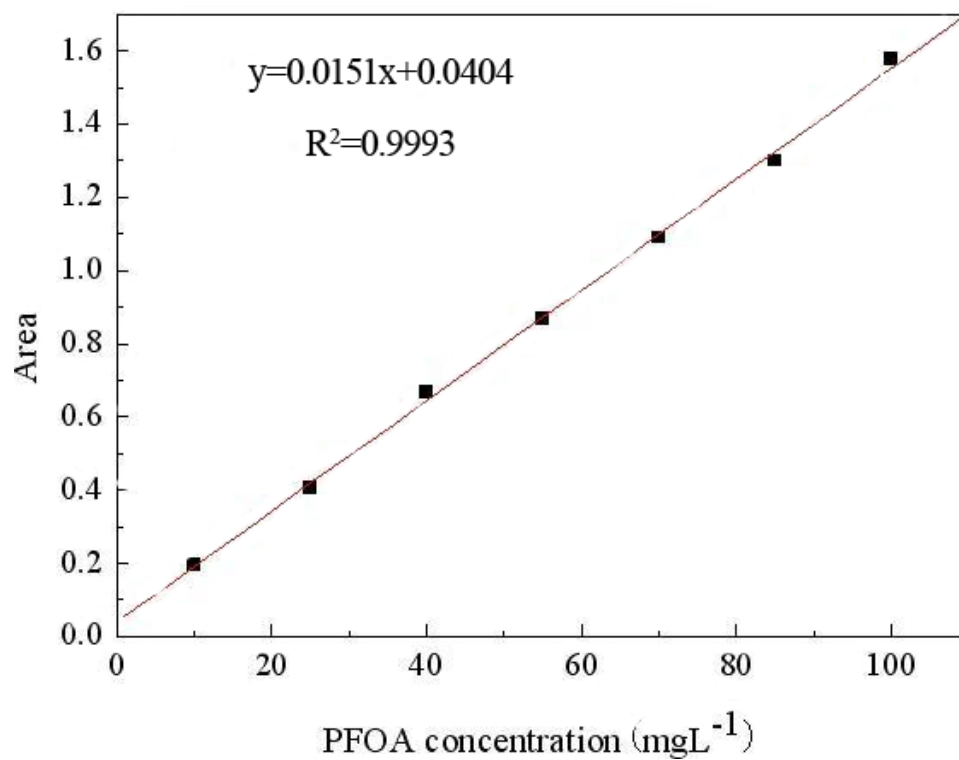

49

50

51 **Fig. S1** The quantitative standard curve of PFOA

52

53

54

55

56

57

58

59

60

61

62

63

64 **Table S2** Sorption kinetics of PFOA on ACF and the fitting parameters using the pseudo-first-  
 65 order and the pseudo-second-order models

66

| Absorbent | Final pH | Pseudo-first-order      |                             |       | Pseudo-second-order        |                             |       |
|-----------|----------|-------------------------|-----------------------------|-------|----------------------------|-----------------------------|-------|
|           |          | $kl$ (h <sup>-1</sup> ) | $q_e$ (mg g <sup>-1</sup> ) | $R^2$ | $k_2^*$ (h <sup>-1</sup> ) | $q_e$ (mg g <sup>-1</sup> ) | $R^2$ |
| ACF       | 7.0      | 0.97                    | 103.97                      | 0.986 | 1.32                       | 115.24                      | 0.998 |

67

68

69

70

71

72

73

74

75

76

77

78

79

80

81

82

83 **Table S3** Kinetic parameters of intraparticle diffusion model for PFOA sorption on ACF

84

| Adsorbent | Intraparticle diffusion model |                      |       |
|-----------|-------------------------------|----------------------|-------|
|           | $k_{WM} (h^{-1/2})$           | $C (\mu mol g^{-1})$ | $R^2$ |
| ACF       | $61.98 \pm 2.09$              | $-0.57 \pm 1.97$     | 0.995 |

85

86

87

88

89

90

91

92

93

94

95

96

97

98

99

100

101

102

103

104 **Table S4** Sorption equilibrium constants of Freundlich model and Langmuir model for PFOA

105 sorption on ACF

| Absorbent | Langmuir constants         |                             |       | Freundlich constants |                                                               |       |
|-----------|----------------------------|-----------------------------|-------|----------------------|---------------------------------------------------------------|-------|
|           | $kl$ (mg L <sup>-1</sup> ) | $Q_0$ (mg g <sup>-1</sup> ) | $R^2$ | $n^{-1}$             | $K_F$ (mg <sup>1-1/n</sup> L <sup>1/n</sup> g <sup>-1</sup> ) | $R^2$ |
| ACF       | 63.37                      | 400.63                      | 0.969 | 0.43                 | 30.21                                                         | 0.990 |

106

107

108

109

110

111

112

113

114

115

116

117

118

119

120

121

122

123

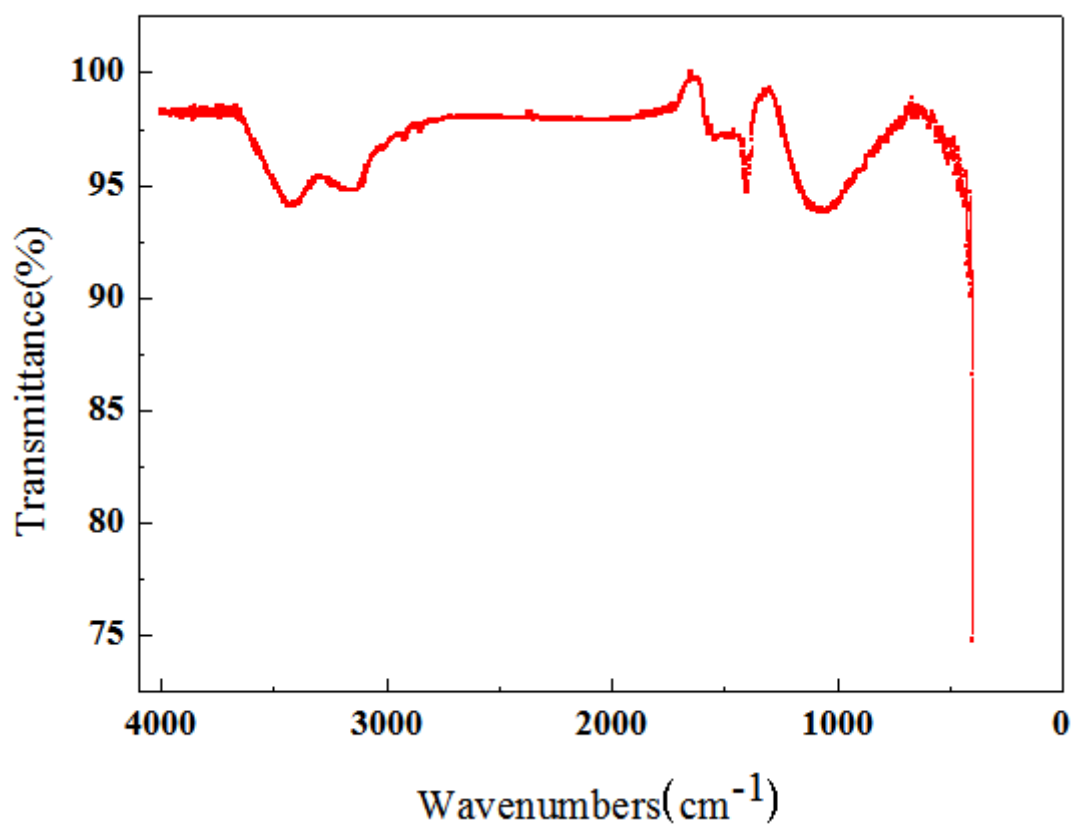

124

125

126 **Fig. S2** Fourier transform infrared spectroscopy (FT-IR) spectrum of ACF

127

128

129

130

131

132

133

134

135



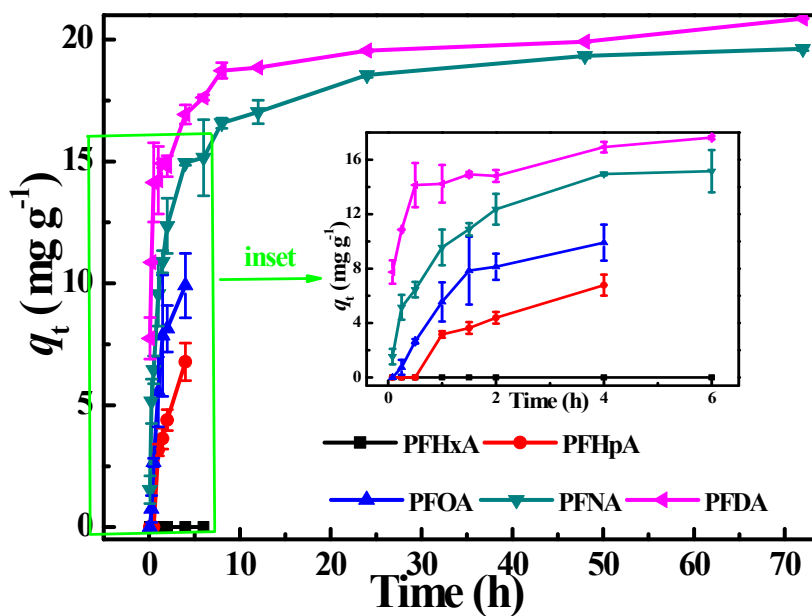

136

137 **Fig. S3** Sorption capacities of PFCAs solution containing PFHxA, PFHpA, PFOA, PFNA and

138 PFDA on ACF in the mixed PFCA systems (PFCAs at each concentration of 1 mg L<sup>-1</sup> and

139 ACF of 5 mg)

140

141
